# Supplementary material for: Race and Ethnicity and Emergency Department Discharge Against Medical Advice
Source: PubMed Central journal article supplement — JAMA Netw Open. 2023 Nov 28;6(11):e2345437. doi: 10.1001/jamanetworkopen.2023.45437 (PMC10685883; doi:10.1001/jamanetworkopen.2023.45437), 2023-11-28
Supplement: jamanetwopen-e2345437-s001.pdf [file jamanetwopen-e2345437-s001.pdf]

## Supplemental Online Content

Tsai JW, Janke A, Krumholz HM, Khidir H, Venkatesh A. Race and ethnicity and emergency department discharge against medical advice. *JAMA Netw Open*. 2023;6(11):e2345437. doi:10.1001/jamanetworkopen.2023.45437

**eTable 1.** Sample Hospital Characteristics (Primary Analysis and Secondary Analysis)

**eTable 2.** Discharges Against Medical Advice (DAMA) Rates By Race and Ethnicity for Fifty Most Common Emergency Department (ED) Conditions

**eTable 3.** Emergency Department (ED) Conditions With Average Discharges Against Medical Advice (DAMA) Rate >4%

This supplemental material has been provided by the authors to give readers additional information about their work.

| <b>eTable 1. Sample hospital characteristics (Primary analysis and Secondary analysis)</b> |                                                    |                                                      |                                                        |
|--------------------------------------------------------------------------------------------|----------------------------------------------------|------------------------------------------------------|--------------------------------------------------------|
|                                                                                            | Hospitals Included,<br>Primary Analysis<br>(N=989) | Hospitals Included,<br>Secondary Analysis<br>(N=401) | Hospitals Excluded<br>from Primary Analyses<br>(N=588) |
| <b>Region</b>                                                                              |                                                    |                                                      |                                                        |
| <b>Northeast</b>                                                                           | 121                                                | 74                                                   | 47                                                     |
| <b>Midwest</b>                                                                             | 301                                                | 77                                                   | 224                                                    |
| <b>South</b>                                                                               | 367                                                | 152                                                  | 215                                                    |
| <b>West</b>                                                                                | 200                                                | 98                                                   | 102                                                    |
| <b>Hospital Control<br/>Status</b>                                                         |                                                    |                                                      |                                                        |
| <b>Government/private<br/>(collapsed category)</b>                                         | 76                                                 | 51                                                   | 25                                                     |
| <b>Government,<br/>nonfederal</b>                                                          | 211                                                | 50                                                   | 161                                                    |
| <b>Private, not-for-<br/>profit</b>                                                        | 465                                                | 192                                                  | 273                                                    |
| <b>Private, investor-<br/>owned</b>                                                        | 162                                                | 71                                                   | 91                                                     |
| <b>Private (collapsed<br/>category)</b>                                                    | 75                                                 | 37                                                   | 38                                                     |
| <b>Teaching Status</b>                                                                     |                                                    |                                                      |                                                        |
| <b>Metropolitan non-<br/>teaching</b>                                                      | 270                                                | 124                                                  | 146                                                    |
| <b>Metropolitan<br/>teaching</b>                                                           | 338                                                | 245                                                  | 93                                                     |
| <b>Non-metropolitan<br/>hospital</b>                                                       | 381                                                | 32                                                   | 349                                                    |
| <b>Urban-Rural<br/>Designation</b>                                                         |                                                    |                                                      |                                                        |
| <b>Large metro</b>                                                                         | 330                                                | 233                                                  | 97                                                     |
| <b>Small metro</b>                                                                         | 270                                                | 130                                                  | 140                                                    |
| <b>Micropolitan</b>                                                                        | 146                                                | 25                                                   | 121                                                    |
| <b>Not<br/>metro/micropolitan</b>                                                          | 223                                                | 4                                                    | 219                                                    |
| <b>Collapsed categories</b>                                                                | 20                                                 | 9                                                    | 11                                                     |
| <b>ED Visit Volume</b>                                                                     |                                                    |                                                      |                                                        |
| <b>&lt;20k</b>                                                                             | 451                                                | 26                                                   | 425                                                    |
| <b>20-40k</b>                                                                              | 221                                                | 119                                                  | 102                                                    |
| <b>40-60k</b>                                                                              | 145                                                | 102                                                  | 43                                                     |
| <b>60-80k</b>                                                                              | 82                                                 | 70                                                   | 12                                                     |
| <b>80-100k</b>                                                                             | 46                                                 | 41                                                   | 5                                                      |
| <b>&gt;100k</b>                                                                            | 44                                                 | 43                                                   | 1                                                      |
| <b>Total ED Visits<br/>(unweighted), N</b>                                                 | 33,147,251                                         | 23,534,062                                           | 9,613,189                                              |

**eTable 2.** Discharges Against Medical Advice (DAMA) Rates By Race and Ethnicity for Fifty Most Common Emergency Department (ED) Conditions

| Top 50 Most Common CCSR Conditions                            | Percentage of Total ED Visits* | DAMA Rates**          |                       |        |
|---------------------------------------------------------------|--------------------------------|-----------------------|-----------------------|--------|
|                                                               |                                | Black                 | Hispanic              | White  |
| Abdominal pain and other digestive/abdomen signs and symptoms | 4.45%                          | 4.48% <sup>†††</sup>  | 3.39% <sup>†††</sup>  | 2.70%  |
| Other specified upper respiratory infections                  | 3.88%                          | 0.54% <sup>†††</sup>  | 0.39%                 | 0.40%  |
| Nonspecific chest pain                                        | 3.85%                          | 4.70% <sup>†††</sup>  | 4.13% <sup>†††</sup>  | 3.99%  |
| Superficial injury; contusion, initial encounter              | 3.47%                          | 0.83% <sup>†††</sup>  | 0.85% <sup>†††</sup>  | 0.64%  |
| Sprains and strains, initial encounter                        | 3.09%                          | 0.29% <sup>†††</sup>  | 0.26% <sup>††</sup>   | 0.21%  |
| Musculoskeletal pain, not low back pain                       | 3.08%                          | 2.70% <sup>†††</sup>  | 2.82% <sup>†††</sup>  | 2.13%  |
| Urinary tract infections                                      | 2.57%                          | 0.62% <sup>†††</sup>  | 0.50%                 | 0.46%  |
| Skin and subcutaneous tissue infections                       | 2.19%                          | 1.14% <sup>†††</sup>  | 1.27% <sup>†††</sup>  | 1.45%  |
| Headache; including migraine                                  | 2.07%                          | 3.03% <sup>†††</sup>  | 2.52% <sup>†††</sup>  | 1.93%  |
| Open wounds to limbs, initial encounter                       | 1.94%                          | 1.32% <sup>†††</sup>  | 0.98% <sup>†††</sup>  | 0.62%  |
| Respiratory signs and symptoms                                | 1.88%                          | 4.18% <sup>†††</sup>  | 3.58% <sup>†††</sup>  | 2.95%  |
| Septicemia                                                    | 1.54%                          | 0.22%                 | 0.23%                 | 0.22%  |
| Unacceptable PDX (miscellaneous diagnoses)                    | 1.54%                          | 14.08% <sup>†††</sup> | 12.30% <sup>†††</sup> | 11.18% |
| Nausea and vomiting                                           | 1.50%                          | 2.84% <sup>†††</sup>  | 2.20% <sup>†††</sup>  | 1.95%  |
| Other specified complications in pregnancy                    | 1.45%                          | 2.88% <sup>†††</sup>  | 1.92% <sup>†††</sup>  | 1.67%  |
| Spondylopathies/spondyloarthropathy (including infective)     | 1.34%                          | 1.23% <sup>†††</sup>  | 1.15% <sup>†††</sup>  | 0.97%  |
| Open wounds of head and neck, initial encounter               | 1.34%                          | 1.42% <sup>†††</sup>  | 1.11% <sup>†††</sup>  | 0.81%  |
| Acute bronchitis                                              | 1.33%                          | 0.33%                 | 0.24% <sup>†††</sup>  | 0.30%  |
| Other unspecified injury                                      | 1.30%                          | 2.03% <sup>†††</sup>  | 1.86% <sup>†††</sup>  | 1.36%  |
| Fracture of the upper limb, initial encounter                 | 1.21%                          | 0.62% <sup>†††</sup>  | 0.40% <sup>†††</sup>  | 0.30%  |
| Influenza                                                     | 1.17%                          | 0.29%                 | 0.32%                 | 0.29%  |
| Viral infection                                               | 1.16%                          | 0.34% <sup>†††</sup>  | 0.28%                 | 0.26%  |
| Pneumonia (except that caused by tuberculosis)                | 1.15%                          | 0.82% <sup>†††</sup>  | 0.50% <sup>†††</sup>  | 0.69%  |
| Alcohol-related disorders                                     | 1.12%                          | 3.55% <sup>††</sup>   | 4.21% <sup>†††</sup>  | 3.33%  |
| Low back pain                                                 | 1.09%                          | 1.70% <sup>†</sup>    | 1.79% <sup>††</sup>   | 1.57%  |

|                                                                    |              |                          |                      |              |
|--------------------------------------------------------------------|--------------|--------------------------|----------------------|--------------|
| <b>Otitis media</b>                                                | <b>1.06%</b> | <b>0.12%<sup>†</sup></b> | <b>0.12%</b>         | <b>0.09%</b> |
| <b>Asthma</b>                                                      | 1.06%        | 1.26% <sup>†††</sup>     | 1.34% <sup>†††</sup> | 0.97%        |
| <b>Disorders of teeth and gingiva</b>                              | 1.03%        | 0.99% <sup>†</sup>       | 1.17% <sup>†††</sup> | 0.88%        |
| <b>Diabetes mellitus with complication</b>                         | 1.02%        | 1.94% <sup>†††</sup>     | 1.62%                | 1.64%        |
| <b>Heart failure</b>                                               | 0.94%        | 1.05% <sup>†††</sup>     | 0.82% <sup>†††</sup> | 0.62%        |
| <b>Syncope</b>                                                     | 0.92%        | 4.21% <sup>†††</sup>     | 3.60% <sup>†††</sup> | 2.86%        |
| <b>Chronic obstructive pulmonary disease and bronchiectasis</b>    | 0.91%        | 1.63% <sup>†</sup>       | 1.83% <sup>†††</sup> | 1.47%        |
| <b>Noninfectious gastroenteritis</b>                               | 0.89%        | 0.57% <sup>††</sup>      | 0.46%                | 0.48%        |
| <b>General sensation/perception signs and symptoms</b>             | 0.88%        | 3.72% <sup>†††</sup>     | 3.10% <sup>†††</sup> | 2.13%        |
| <b>Fluid and electrolyte disorders</b>                             | 0.85%        | 1.67% <sup>†††</sup>     | 1.22%                | 1.20%        |
| <b>Epilepsy; convulsions</b>                                       | 0.81%        | 2.76% <sup>†††</sup>     | 2.08% <sup>†††</sup> | 2.45%        |
| <b>Skin/Subcutaneous signs and symptoms</b>                        | 0.78%        | 3.27% <sup>†††</sup>     | 2.80%                | 2.59%        |
| <b>Other specified and unspecified gastrointestinal disorders</b>  | 0.78%        | 0.87% <sup>†††</sup>     | 0.67%                | 0.64%        |
| <b>Fracture of the lower limb (except hip), initial encounter</b>  | 0.74%        | 0.36%                    | 0.36% <sup>†</sup>   | 0.28%        |
| <b>Fever</b>                                                       | 0.74%        | 3.27% <sup>†††</sup>     | 2.98% <sup>†††</sup> | 2.21%        |
| <b>Cardiac dysrhythmias</b>                                        | 0.72%        | 1.35% <sup>†††</sup>     | 1.19% <sup>†††</sup> | 0.87%        |
| <b>Anxiety and fear-related disorders</b>                          | 0.70%        | 2.76% <sup>†††</sup>     | 2.31% <sup>†</sup>   | 2.06%        |
| <b>Circulatory signs and symptoms</b>                              | 0.64%        | 3.19% <sup>†††</sup>     | 2.76% <sup>†††</sup> | 1.90%        |
| <b>Essential hypertension</b>                                      | 0.64%        | 2.27% <sup>†††</sup>     | 1.97% <sup>†††</sup> | 1.38%        |
| <b>Cornea and external disease</b>                                 | 0.63%        | 0.32%                    | 0.25%                | 0.28%        |
| <b>Traumatic brain injury (TBI); concussion, initial encounter</b> | 0.57%        | 0.81% <sup>†††</sup>     | 0.59%                | 0.49%        |
| <b>Depressive disorders</b>                                        | 0.57%        | 1.17% <sup>†††</sup>     | 0.89%                | 0.76%        |
| <b>Biliary tract disease</b>                                       | 0.55%        | 1.01% <sup>†††</sup>     | 0.78%                | 0.70%        |
| <b>Suicidal ideation/attempt/intentional self-harm</b>             | 0.53%        | 1.32% <sup>†††</sup>     | 0.99%                | 0.92%        |
| <b>Other general signs and symptoms</b>                            | 0.53%        | 5.55% <sup>†††</sup>     | 4.01%                | 4.52%        |

\* Percentage denominator total weighted sample of emergency department visits (N=143,432,284)

\*\*Percentage of condition-specific ED visits resulting in DAMA per race and ethnicity group

Pairwise comparison for Black versus white and Hispanic versus white, statistically significant <sup>†</sup>for p<0.05, <sup>††</sup>for p<0.01, <sup>†††</sup>for p<0.001,

CCSR= Clinical Classifications Software Refined diagnosis groupings

| <b>eTable 3. Emergency Department (ED) Conditions With Average Discharges Against Medical Advice (DAMA) Rate &gt; 4%</b> |                                       |                     |                 |              |
|--------------------------------------------------------------------------------------------------------------------------|---------------------------------------|---------------------|-----------------|--------------|
| <b>Top 50 Most Common CCSR Conditions</b>                                                                                | <b>Percentage of Total ED Visits*</b> | <b>DAMA Rates**</b> |                 |              |
|                                                                                                                          |                                       | <b>Black</b>        | <b>Hispanic</b> | <b>White</b> |
| <b>Miscellaneous mental and behavioral disorders/conditions</b>                                                          | 0.02%                                 | 3.91%               | 4.33%           | 4.22%        |
| <b>Nonspecific chest pain</b>                                                                                            | 3.87%                                 | 4.11%               | 4.63%           | 3.93%        |
| <b>Opioid-related disorders</b>                                                                                          | 0.14%                                 | 4.31%               | 3.98%           | 4.14%        |
| <b>Other general signs and symptoms</b>                                                                                  | 0.53%                                 | 4.11%               | 5.36%           | 4.37%        |
| <b>Other specified status</b>                                                                                            | 0.04%                                 | 9.66%               | 5.92%           | 8.68%        |
| <b>Other specified substance-related disorders</b>                                                                       | 0.13%                                 | 3.96%               | 4.83%           | 4.48%        |
| <b>Poisoning by drugs, initial encounter</b>                                                                             | 0.37%                                 | 4.15%               | 4.09%           | 5.84%        |

\* Percentage denominator total weighted sample of emergency department visits (N=143,432,284)

\*\*Percentage of condition-specific ED visits resulting in DAMA per race and ethnicity group

CCSR= Clinical Classifications Software Refined diagnosis groupings
