# Supplementary material for: Race and Ethnicity and Emergency Department Discharge Against Medical Advice
Source: PubMed Central journal article supplement — JAMA Netw Open. 2023 Nov 28;6(11):e2345437. doi: 10.1001/jamanetworkopen.2023.45437 (PMC10685883; doi:10.1001/jamanetworkopen.2023.45437), 2023-11-28
Supplement: jamanetwopen-e2345437-s002.pdf [file jamanetwopen-e2345437-s002.pdf]

## Data Sharing Statement

Tsai. Race and Ethnicity and Emergency Department Discharge Against Medical Advice.  
*JAMA Netw Open*. Published November 28, 2023. doi:10.1001/jamanetworkopen.2023.45437

### Data

**Data available:** No

### Additional Information

**Explanation for why data not available:** Using NEDS database, which requires payment
